# Supplementary material for: A two decade dementia incidence comparison from the Cognitive Function and Ageing Studies I and II
Source: PubMed Central journal article supplement (PMC4838896; doi:10.1038/ncomms11398), 2016-04-19
Supplement: ncomms11398-s1.pdf [file ncomms11398-s1.pdf]

Supplementary table 1: Total numbers, proportion died and numbers with known dementia status by study

| Area           | Baseline interview at wave 1 | CFAS I                |                             |                                               |          | Baseline interview at wave 1 | CFAS II               |            |                                               |          |
|----------------|------------------------------|-----------------------|-----------------------------|-----------------------------------------------|----------|------------------------------|-----------------------|------------|-----------------------------------------------|----------|
|                |                              | Interviewed at wave 2 | All dementia / Known status | Incident cases / Free of dementia at baseline | Died (%) |                              | Interviewed at wave 2 | All cases  | Incident cases / Free of dementia at baseline | Died (%) |
| Cambridgeshire | 2601                         | 1720                  | 114 / 629                   | 30 / 247                                      | 10.6     | 2558                         | 1755                  | 87 / 1755  | 53 / 1721                                     | 6.8      |
| Newcastle      | 2522                         | 1705                  | 106 / 551                   | 25 / 251                                      | 10.1     | 2582                         | 1751                  | 109 / 1732 | 64 / 1687                                     | 8.7      |
| Nottingham     | 2512                         | 1731                  | 147 / 619                   | 31 / 251                                      | 11.5     | 2622                         | 1782                  | 79 / 1782  | 56 / 1759                                     | 9.3      |
| Men            |                              |                       |                             |                                               |          |                              |                       |            |                                               |          |
| 65-69          | 915                          | 696                   | 15 / 203                    | 5 / 101                                       | 6.2      | 968                          | 738                   | 8 / 738    | 8 / 738                                       | 3.0      |
| 70-74          | 780                          | 562                   | 18 / 155                    | 7 / 83                                        | 8.6      | 902                          | 673                   | 23 / 673   | 13 / 663                                      | 5.2      |
| 75-79          | 696                          | 466                   | 22 / 134                    | 3 / 48                                        | 15.8     | 758                          | 531                   | 29 / 531   | 18 / 520                                      | 6.9      |
| 80-84          | 449                          | 271                   | 27 / 97                     | 6 / 29                                        | 20.7     | 542                          | 347                   | 33 / 347   | 17 / 331                                      | 13.7     |
| 85+            | 205                          | 110                   | 28 / 55                     | 5 / 18                                        | 28.8     | 364                          | 193                   | 22 / 186   | 14 / 178                                      | 25.3     |
| Women          |                              |                       |                             |                                               |          |                              |                       |            |                                               |          |
| 65-69          | 1066                         | 778                   | 11 / 218                    | 6 / 113                                       | 2.4      | 971                          | 741                   | 9 / 741    | 7 / 739                                       | 2.4      |
| 70-74          | 996                          | 693                   | 18 / 223                    | 7 / 112                                       | 4.3      | 971                          | 696                   | 12 / 696   | 9 / 693                                       | 2.9      |
| 75-79          | 1029                         | 718                   | 42 / 239                    | 13 / 96                                       | 8.3      | 866                          | 591                   | 32 / 591   | 18 / 577                                      | 5.1      |
| 80-84          | 859                          | 526                   | 93 / 257                    | 14 / 83                                       | 14.9     | 736                          | 456                   | 50 / 456   | 37 / 443                                      | 11.7     |
| 85+            | 640                          | 336                   | 93 / 218                    | 20 / 66                                       | 23.6     | 684                          | 322                   | 57 / 310   | 32 / 285                                      | 24.6     |
| Total          |                              |                       |                             |                                               |          |                              |                       |            |                                               |          |
| 65-69          | 1981                         | 1474                  | 26 / 421                    | 11 / 214                                      | 4.2      | 1939                         | 1479                  | 17 / 1479  | 15 / 1477                                     | 2.7      |
| 70-74          | 1776                         | 1255                  | 36 / 378                    | 14 / 195                                      | 6.2      | 1873                         | 1369                  | 35 / 1369  | 22 / 1356                                     | 4.0      |
| 75-79          | 1725                         | 1184                  | 64 / 373                    | 16 / 144                                      | 11.3     | 1624                         | 1122                  | 61 / 1122  | 36 / 1097                                     | 5.9      |
| 80-84          | 1308                         | 797                   | 120 / 354                   | 20 / 112                                      | 16.9     | 1278                         | 803                   | 83 / 803   | 54 / 774                                      | 12.5     |
| 85+            | 845                          | 446                   | 121 / 273                   | 25 / 84                                       | 24.9     | 1048                         | 515                   | 79 / 496   | 46 / 463                                      | 24.8     |

Supplementary Table 2: Impact of adjustment on deprivation analysis

|                       | <b>Not adjusted</b>      | <b>Adjusted for<br/>age and sex</b> | <b>Adjusted for<br/>age, sex and<br/>area</b> |
|-----------------------|--------------------------|-------------------------------------|-----------------------------------------------|
| <b>CFAS I</b>         |                          |                                     |                                               |
| <b>Least deprived</b> | 1                        | 1                                   | 1                                             |
| <b>Middle</b>         | 1.1 (0.7-1.6)            | 1.0 (0.7-1.5)                       | 1.0 (0.6-1.4)                                 |
| <b>Most deprived</b>  | 1.0 (0.6-1.5)            | 0.9 (0.6-1.4)                       | 0.8 (0.5-1.3)                                 |
| <b>Trend</b>          | 1.0 (0.8-1.2)<br>p=0.83  | 1.0 (0.8-1.2)<br>p=0.79             | 0.92 (0.7-1.1)<br>p=0.44                      |
| <b>CFAS II</b>        |                          |                                     |                                               |
| <b>Least deprived</b> | 1                        | 1                                   | 1                                             |
| <b>Middle</b>         | 1.3 (0.9-1.9)            | 1.3 (0.9-1.8)                       | 1.3 (0.9-1.8)                                 |
| <b>Most deprived</b>  | 1.5 (1.0-2.2)            | 1.3 (0.9-2.0)                       | 1.3 (0.8-1.9)                                 |
| <b>Trend</b>          | 1.21 (1.0-1.5)<br>p=0.05 | 1.15 (0.9-1.4)<br>p=0.16            | 1.12 (0.9-1.4)<br>p=0.26                      |

Supplementary Table 3: Comparison of methods (modelled incidence rate)

| Age   | CFAS I          |             |                  |             |                       |              |
|-------|-----------------|-------------|------------------|-------------|-----------------------|--------------|
|       | Full likelihood |             | Pseudolikelihood |             | Direct incidence only |              |
| 65-69 | 8.2             | (4.9-13.5)  | 8.4              | (4.4-14.8)  | 11.86                 | (4.4-41.5)   |
| 70-74 | 9.8             | (6.1-15.8)  | 8.9              | (4.5-16.2)  | 17.35                 | (7.6-48.0)   |
| 75-79 | 18.3            | (11.7-28.7) | 17.1             | (10.0-25.5) | 18.58                 | (10.8-33.9)  |
| 80-84 | 38.0            | (27.4-52.8) | 31.6             | (21.5-45.7) | 35.58                 | (20.9-63.2)  |
| 85+   | 62.6            | (44.7-87.7) | 65.9             | (45.3-91.3) | 77.93                 | (46.4-133.4) |

  

| Age   | CFAS II         |             |                          |             |
|-------|-----------------|-------------|--------------------------|-------------|
|       | Full likelihood |             | Poisson model – weighted |             |
| 65-69 | 4.8             | (2.9-8.1)   | 4.9                      | (2.4-7.5)   |
| 70-74 | 7.5             | (4.9-11.5)  | 7.6                      | (4.4-10.8)  |
| 75-79 | 16.4            | (11.7-22.9) | 16.9                     | (11.3-22.5) |
| 80-84 | 33.6            | (25.8-43.8) | 33.3                     | (24.3-42.3) |
| 85+   | 49.4            | (36.6-66.5) | 51.5                     | (36.3-66.7) |

Rates per 1000 person years and 95% confidence intervals
